# Supplementary material for: Epigenetic Dysregulation of Mammalian Male Meiosis Caused by Interference of Recombination and Synapsis
Source: MDPI journal article supplement (doi:10.3390/cells10092311), 2021-09-03
Supplement: s1 [file s1]

Article

# Epigenetic Dysregulation of Mammalian Male Meiosis Caused by Interference of Recombination and Synapsis

Roberto de la Fuente <sup>1,2</sup>, Florencia Pratto <sup>3</sup>, Abrahan Hernández-Hernández <sup>4,†</sup>, Marcia Manterola <sup>5</sup>, Pablo López-Jiménez <sup>1</sup>, Rocío Gómez <sup>1</sup>, Alberto Viera <sup>1</sup>, María Teresa Parra <sup>1</sup>, Anna Kouznetsova <sup>4</sup>, R. Daniel Camerini-Otero <sup>3</sup>, and Jesús Page <sup>1,\*</sup>

## Supplementary Materials

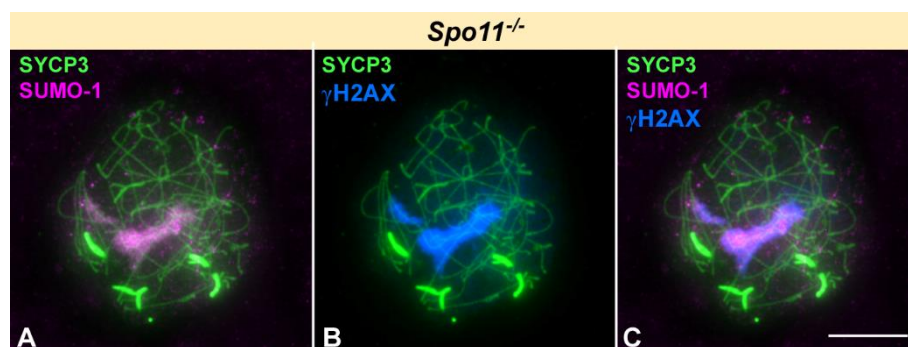

**Supplementary Figure S1:** Immunolocalisation of SYCP3 (green) SUMO-1 (pink) and  $\gamma$ H2AX (blue) in a zygotene-like spermatocyte in *Spo11* knockout mice. A diffuse signal is observed with SUMO-1, which co-localised with the signal of  $\gamma$ H2AX. Scale bar: 10  $\mu$ m.

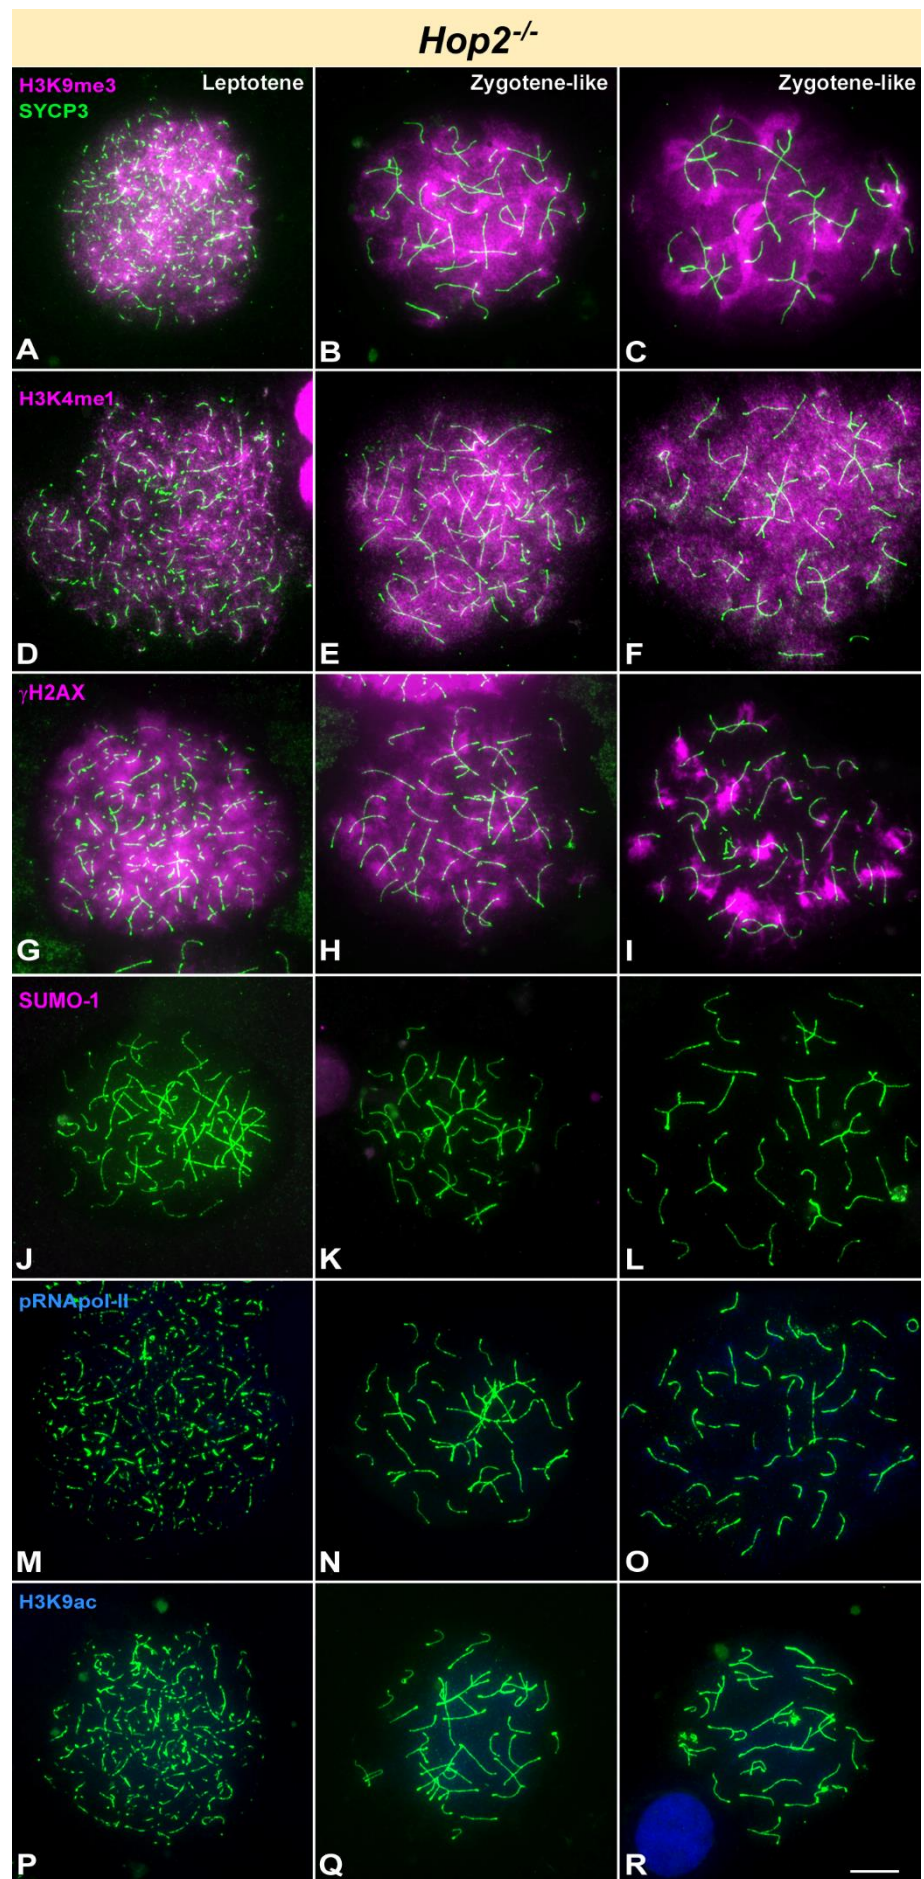

**Supplementary Figure S2.** Immunolocalisation of SYCP3 (green) and epigenetic markers of silencing (pink) or transcription activation (blue) in *Hop2* knockout mice. Cells in each column are classified as leptotene or zygotene-like. **(A-C)**. An intense H3K9me3 labelling is detected in the nucleus in all stages, although it appears slightly more intense in the pericentromeric regions at the late stages. **(D-F)**. H3K4me1 strongly marks the entire nucleus of the spermatocytes at all stages. **(G-I)**.  $\gamma$ H2AX labelling is spread over the entire nucleus in leptotene and some zygotene-like spermatocytes. In some zygotene-like stages **(I)** labelling concentrates as large foci over some autosomal regions. **(J-L)**. SUMO-1 is not detected at any stage on these mutants. **(M-O)**. No signal of pRNAPol-II is detected at any stage. **(P-R)**. H3K9ac is not detected in early leptotene. At zygotene-like, a weak signal is observed in the whole nucleus. Scale bar: 10  $\mu$ m.
